# Supplementary material for: Effect of high dose folic acid supplementation in pregnancy on pre-eclampsia (FACT): double blind, phase III, randomised controlled, international, multicentre trial
Source: PubMed Central journal article supplement — BMJ. 2018 Sep 13;362:k3478. doi: 10.1136/bmj.k3478 (PMC6133042; doi:10.1136/bmj.k3478), 2018-09-13
Supplement: wens044406.wt1.pdf [file wens044406.wt1.pdf]

## **Supplemental Appendix**

### **Effect of folic acid supplementation in pregnancy on preeclampsia - FACT**

Shi Wu Wen, Ruth Rennicks White, Natalie Rybak, Laura Gaudet, Stephen Robson, William Hague, Donnette Simms-Stewart, Guillermo Carroli, Graeme Smith, William D. Fraser, George Wells, Sandra T. Davidge, John Kingdom, Doug Coyle, Dean Fergusson, Daniel J Corsi, Josee Champagne, Elham Sabri, Tim Ramsay, Ben Willem J. Mol, Martijn A Oudijk, Mark C Walker, on behalf of the FACT Collaborating Group

#### **Table of Contents**

1. Table S1: List of Participating Countries and Sites (Total Recruited)
2. Table S2: Reported adverse events between the two arms
3. Table S3: Comparison of maternal inclusion criteria between the two arms
4. Table S4: Comparison of primary outcome by country

**Table S1 – List of Participating Countries and Sites (Total Recruited)**

| <b>CANADA (1207)</b>                                                 |
|----------------------------------------------------------------------|
| Centre Hospitalier Universitaire de Québec (225)                     |
| Centre Hospitalier Universitaire Sainte-Justine (31)                 |
| Children's & Women's Health Centre of British Columbia (16)          |
| Foothills Medical Centre (35)                                        |
| Health Sciences Centre – General Hospital, Newfoundland (29)         |
| Hôpital Saint-Luc, CHUM (133)                                        |
| Kingston General Hospital & Queen's University at Kingston (71)      |
| Lois Hole Hospital (31)                                              |
| London Health Sciences Centre – Victoria Hospital (23)               |
| McMaster University Medical Centre (161)                             |
| Regina General Hospital (8)                                          |
| Royal Victoria Hospital (1)                                          |
| Saint John Regional Hospital (2)                                     |
| Sault Area Hospital (2)                                              |
| St. Boniface General Hospital (16)                                   |
| St-Mary's Hospital (34)                                              |
| St-Paul's Hospital (6)                                               |
| Sunnybrook Research Institute—Sunnybrook Health Sciences Centre (21) |
| The Dr. Everett Chalmers Regional Hospital (52)                      |
| The Moncton Hospital (102)                                           |
| The Ottawa Hospital—Civic Campus (33)                                |
| The Ottawa Hospital—General Campus (96)                              |
| The University of Manitoba (79)                                      |
| <b>UNITED KINGDOM (764)</b>                                          |
| 49 Marine Avenue Surgery (6)                                         |
| Burnley General Hospital (18)                                        |
| Darlington Memorial Hospital (7)                                     |
| Fairfield General Hospital (3)                                       |
| Gateshead Queen Elizabeth Hospital (28)                              |
| Guy's & St Thomas' Hospital (66)                                     |
| Hinchingbrooke Hospital (8)                                          |
| James Cook University Hospital (54)                                  |
| Leighton Hospital (20)                                               |
| Lincoln County Hospital (9)                                          |
| Newcastle Upon Tyne Hospital (76)                                    |
| New Cross Hospital (5)                                               |
| Norfolk & Norwich (18)                                               |
| North Cumbria University Hospital (5)                                |
| North Manchester General Hospital (4)                                |
| North Tyneside General Hospital (21)                                 |
| Nottingham City Hospital (2)                                         |
| Queen's Medical Centre (13)                                          |
| Rochdale Infirmary (1)                                               |
| Royal Blackburn Hospital (16)                                        |
| South Tyneside District Hospital (43)                                |
| St George's Hospital (50)                                            |
| Sunderland Royal Hospital (122)                                      |
| The Hillingdon Hospital (7)                                          |
| The Royal Oldham Hospital (2)                                        |
| University Hospital of North Durham (28)                             |
| University Hospital of North Tees (33)                               |
| Wansbeck General Hospital (31)                                       |
| Warrington Hospital (11)                                             |
| West Cumberland Hospital (21)                                        |
| West Middlesex University Hospital (36)                              |
| <b>AUSTRALIA (310)</b>                                               |
| Ipswich Hospital (92)                                                |
| Nepean Hospital (7)                                                  |
| Sunshine Hospital (35)                                               |
| The Royal Women's Hospital (105)                                     |
| The Townsville Hospital (5)                                          |
| The Women's and Children's Hospital (66)                             |
| <b>ARGENTINA (122)</b>                                               |
| CEMIC (12)                                                           |
| Hospital Escuela Eva Perón (12)                                      |
| Hospital Provincial (17)                                             |

Hospital Roque Saenz Pena (24)  
 Hospital Iturraspe (8)  
 Maternidad Martin (47)  
 Sanatorio de la Mujer (2)

**JAMAICA (61)**

Spanish Town Hospital (20)  
 The University of West Indies—Mona Campus (40)  
 Victoria Jubilee Hospital (1)

**Table S2 - Reported adverse events between the two arms**

| Adverse Events              |                          |       |                       |       |                     |         |
|-----------------------------|--------------------------|-------|-----------------------|-------|---------------------|---------|
|                             | n                        | %     | n                     | %     | RR (95% CI)         | p value |
| <b>Infants</b>              |                          |       |                       |       |                     |         |
| <b>Any Event</b>            | 289                      | 20.73 | 318                   | 22.75 | 0.89 (0.76 to 1.03) | 0.12    |
| 0                           | 1105                     | 79.27 | 1080                  | 77.25 |                     |         |
| 1-2                         | 268                      | 19.23 | 279                   | 19.96 |                     |         |
| 3 and more                  | 21                       | 1.51  | 39                    | 2.79  |                     |         |
| <b>Mothers</b>              |                          |       |                       |       |                     |         |
|                             | <b>Experiment n=1227</b> |       | <b>Placebo n=1236</b> |       |                     |         |
| <b>Any Event</b>            | 961                      | 78.32 | 968                   | 78.32 | 1.00 (0.96 to 1.04) | 1.00    |
| 0                           | 266                      | 21.68 | 268                   | 21.68 |                     |         |
| 1-2                         | 368                      | 29.99 | 355                   | 28.72 |                     |         |
| 3 and more                  | 593                      | 48.33 | 613                   | 49.6  |                     |         |
| <b>Severe Adverse Event</b> |                          |       |                       |       |                     |         |
|                             | n                        | %     | n                     | %     | RR (95% CI)         | p value |
| <b>Infants</b>              |                          |       |                       |       |                     |         |
| <b>Any Event</b>            | 116                      | 8.33  | 109                   | 7.8   | 1.00 (0.75 to 1.32) | 0.97    |
| 0                           | 1277                     | 91.67 | 1289                  | 92.2  |                     |         |
| 1                           | 111                      | 7.97  | 108                   | 7.73  |                     |         |
| 2                           | 5                        | 0.36  | 1                     | 0.07  |                     |         |
| <b>Mothers</b>              |                          |       |                       |       |                     |         |
|                             | <b>Experiment n=1227</b> |       | <b>Placebo n=1236</b> |       |                     |         |
| <b>Any Event</b>            | 227                      | 18.5  | 195                   | 15.78 | 1.17 (0.99 to 1.40) | 0.07    |
| 0                           | 1000                     | 81.5  | 1041                  | 84.22 |                     |         |
| 1                           | 186                      | 15.16 | 156                   | 12.62 |                     |         |
| 2 and more                  | 41                       | 3.34  | 39                    | 3.16  |                     |         |

**Table S3. Comparison of maternal inclusion criteria between the two arms**

| Criteria                        | Folic Acid n=1144 |       | Placebo n=1157 |       | RR (95% CI)         | P value |
|---------------------------------|-------------------|-------|----------------|-------|---------------------|---------|
|                                 | n                 | %     | n              | %     |                     |         |
| Pre-existing hypertension       | 43                | 22.63 | 53             | 22.75 | 0.99 (0.70 to 1.42) | 0.98    |
| Diabetes                        | 30                | 18.18 | 22             | 15.07 | 1.21 (0.73 to 2.00) | 0.46    |
| Twin pregnancy                  | 37                | 17.21 | 21             | 9.86  | 1.75 (1.06 to 2.88) | 0.03    |
| PE in previous pregnancy        | 63                | 21.21 | 66             | 23.24 | 0.91 (0.67 to 1.24) | 0.56    |
| BMI $\geq$ 35 kg/m <sup>2</sup> | 65                | 11.61 | 77             | 12.54 | 0.93 (0.68 to 1.26) | 0.62    |

**Table S4. Comparison of primary outcome by country**

| Country    | Folic Acid n=1144 |       | Placebo n=1157 |       | RR (95% CI)         | P value |
|------------|-------------------|-------|----------------|-------|---------------------|---------|
|            | n                 | %     | n              | %     |                     |         |
| Canada     | 83                | 14.69 | 75             | 12.89 | 1.14 (0.85 to 1.52) | 0.3755  |
| Australia  | 27                | 18.12 | 29             | 20.86 | 0.87 (0.54 to 1.39) | 0.5568  |
| Argentina  | 11                | 19.64 | 10             | 17.54 | 1.12 (0.52 to 2.43) | 0.7743  |
| West India | 5                 | 20.83 | 4              | 13.33 | 1.56 (0.47 to 5.19) | 0.4624  |
| UK         | 43                | 12.29 | 38             | 10.89 | 1.13 (0.75 to 1.70) | 0.5638  |
