# Supplementary material for: Effect of high dose folic acid supplementation in pregnancy on pre-eclampsia (FACT): double blind, phase III, randomised controlled, international, multicentre trial
Source: PubMed Central journal article supplement — BMJ. 2018 Sep 13;362:k3478. doi: 10.1136/bmj.k3478 (PMC6133042; doi:10.1136/bmj.k3478), 2018-09-13
Supplement: wens044406.ww1.pdf [file wens044406.ww1.pdf]

## FACT Collaborating Group - Acknowledgements

---

In addition to the authors, the following people participated in and contributed to the FACT study: **The Trial Coordinating Centre (TCC):** Patti Waddell, Romina Fakhraei, Elisabet White, Adriana Francis, Melin Peng, Meghan Perkins, Alexandre Simon, Dana Burke, Leslie Webb, Allycia Gagnon, Francois Tshibemba, Svetlana Shachkina, Students and Trainees; **FACT Collaborators:** Shoo K. Lee, Mathew Sermer, Sherry Perkins; **DSMB:** Dr. Douglas A. Woelkers, Dr. Robin Walker, Dr. Kevin E. Thorpe; **TCC Pharmacy:** Anne-Marie Dugal, Susan Fetzer, Wendy Aikens; **The Ottawa Hospital—General Campus and Civic Campus:** Dr. George Tawagi, Maureen Rybak, Jenna Rainey, Dr. Jessica Dy, Dynika St. Omer, Kristina Sabou, Dr. Amanda Black; **London Health Sciences Centre – Victoria Hospital:** Robert J. Gratton, Laura McMurphy, Jennifer Ryder; **Kingston General Hospital & Queen’s University at Kingston:** M. Roddy; **The Moncton Hospital:** Lynn Murphy-Kaulbeck, Claire Williams, Stephanie Gillespie, Ruth Macdonald; **The University of Manitoba:** Shayne P. Taback, S. Menticoglou, Carol Schneider, Jennifer C. Hunt, Gregory Reid, Lucy Chura, Laura Soice, Jennifer Swan, Daniel Catte, Krista Rossum, Jaymie Walker, Raj Maharaj, Silvana Fux, Erika Bloomfield; **St. Boniface General Hospital:** Michael E. Helewa, Jennifer C. Hunt, Craig Bury, Janis Harms, Jamie Greco; **Children’s & Women’s Health Centre of British Columbia:** Julie E. Robertson, Anna Hutfield, Laura A. Magee, Chantal Mayer, Ariadna Fernandez, Judy Needham; **Foothills Medical Centre:** Stephan Wood, Leslie Miller, Greta Ellsworth, Jennifer Mercer; **Hôpital Saint-Luc, CHUM :** Marie-Josée Bedard, Bilan Wo, Andre Masse, Marie-Danielle Dionne, Sylvie Daigle; **Health Sciences Centre – General Hospital, Newfoundland:** Joan M.G. Crane, Donna Hutchens; **Regina General Hospital:** George Carson, Suzanne Williams, Sheila Kelly; **Lois Hole Hospital:** Sue Chandra, Cheryl Lux, Venu Jain, Radha Chari, Nestor Demianczuk; **Centre Hospitalier Universitaire Sainte-Justine:** Francois Audibert, Hasna Medour; **Royal Victoria Hospital:** Robert Gagnon, Jennifer Snyder, Monique Guigère, Kathleen Raiche, Ourida Anki; **Centre Hospitalier Universitaire de Québec:** Emmanuel Bujold, Valerie Morin, Katy Gouin, Francois Rousseau, Sylvie Tapp, Amélie Tétu, Josee Mailhot, Francine Dufour, Elisabeth Clouet, Mario Girard, Lucie Dallaire, Eric Proulx, Lorraine Beliveau, Karine Desharmais, Michele Dubeau, Denise St-Pierre; **Sunnybrook Research Institute—Sunnybrook Health Sciences Centre:** Howard Cohen, Jon Barrett, Julie Lowe, Anna Rogowsky, Afsheen Ayaz; **McMaster University Medical Centre:** Bryon F. De France, Suzanne Hamilton, Barbara Brennan; **The Dr. Everett Chalmers Regional Hospital:** Dr. Kimberly Butt, Dr. Erin Holloway, Lynda Nicoll BNRN; **St-Mary’s Hospital:** Dr. Isabelle Girard, Siham Aboufadi, Alexandra Dumont, Julia Rodrigues, Dr. Sonia Macfarlane MDCM, FRCSC; **Saint John Regional Hospital:** James Andrews, Patricia Shea, Mary C. Fraser; **Sault Area Hospital:** Maxine Lingurar, Natalie Kovacevich, Carrie Seguin; **St-Paul’s Hospital:** Valerie Rychel, Nicole A. Koenig; **Fairfield General Hospital, North Manchester General Hospital, The Royal Oldham Hospital & Rochdale Infirmary:** Mr Sachchidananda Maiti, Rachel Newport, Zainab Sarwar Yasin, Grainne O’Connor, Mfon Sam, Uchenna Elenwa; **Newcastle Upon Tyne Hospital:** Nicola Goudie, Alison Kimber, Jill Riches, Carly Allan; **Sunderland Royal Hospital:** Aarti Ullal, Kim Hinshaw, Hm Cameron, A.O Ahmed, CM Emmerson, Eileen Walton, Lesley Hewitt, Gilli Campbell, Deb Bonney, Kath Hubbard, Kathryn Wittee; **Wansbeck General Hospital & North Tyneside General Hospital:** Vinita Raheja, Joy Strachtan, Sarah Cass, Helen Howlett, Siobhan Limerick; **South Tyneside District Hospital:** Umo Esen, Judith Ormonde; **Gateshead Queen Elizabeth Hospital:** Dr. Helene Brandon FRCOG, Christine Moller-Christensen, Barbara Lynam; **James Cook University Hospital:** Dr. Deepika Meneni, Hazel Alexander; **Guy’s & St Thomas’ Hospital:** Andrew Shennan, Annette Briley, Jo Birtwhistle, Jenie Fetherston, Eleanor Hendy, Natasha Hezelgrave, Ruth Leary, Catherine Nelson-Piercy, Hayley Traft, Louise Webster, Hannah Wilson; **West Middlesex University Hospital:** Joanna Girling, Marie O’Connell,

## FACT Collaborating Group - Acknowledgements

---

Christine Adamson, Abdul Sattar Abbasi; **St George's Hospital:** Asma Khalil, Sarah Davies; **University Hospital of North Tees:** Iona Macleod, Sharon Gowans, Anne-Marie Jones; **49 Marine Avenue Surgery:** Justine Norman, Siobhan Limerick; **University Hospital of North Durham & Darlington Memorial Hospital:** Dr. Seema Sen, Eileen Walton, Jean Dent, Vicki Atkinson, Jacqui Jennings; **North Cumbria University Hospital:** Dr. Andrene Hamilton, Mr Ajith Wijesiriwardana, Dr. Leon Jonker, Rachel McCarthy, Toni Wilson, Bev McGuirk, Chris Brewer; **The Hillingdon Hospital:** Shruti Mohan, Laura Pearse; **Nottingham City Hospital:** Nia Jones, Catriona Hussain, Carys Smith, Gill Kirkwood, Yvette Davis, Yvette Gunn; **Hinchingbrooke Hospital:** Dr. Sangeeta Pathak MRCOG MD, Mrs. Tara Pauley BSc(Hons) BA (Hons), Pamela Oracki Research Nurse; **New Cross Hospital:** David Churchill, Kate Cheshire, Julia Icke, Laura Gardiner; **Warrington Hospital:** Dr. Rita Arya, Lindsay Roughley, Rachel Crone; **Leighton Hospital:** Karen McIntyre, Caroline Dixon, Janet Brown; **Burnley General Hospital:** Justine Nugent, Bev Hammond; **Lincoln County Hospital:** Sunday Ikhenka, Sally-Ann Molshter; **Norfolk & Norwich:** Martin Cameron, Rachel Appleton, Elizabeth Turner; **The Royal Women's Hospital:** Andrea Khaw, Dianna Maxwell, Megan Poth; **The Townsville Hospital:** Dr. David Watson, Annemarie Lawrence, Cherie Boniface, Audra Davis; **Ipswich Hospital:** Kassam Mahomed, Jane Hoare, Ann Green, Alison Drew; **The Women's and Children's Hospital:** S Coat, BW Mol, EA Clark, MR Morton, H Grigg, KL Miller; **Nepean Hospital:** Sue Downward, Peta Armstrong, Tracey Codner, Sarah Johnson-Clark, Diane Hansen, Emily Masson, Michael John Peek; **Sunshine Hospital:** Joanne M Said, Lee-Anne Lynch, Jennifer Edwards, Glyn R Teale; **Spanish Town Hospital, The University of West Indies—Mona Campus & Victoria Jubilee Hospital:** Carol Jones Cooper, Orville P. Morgan, Alexander Onyonyor, Sharon White, Faithlee Welsh, Olubunmi Asunmo, Delmore Tyrell, Robert Marston, Jeunette Small, Paul A. Mitchell, Natassia Tate; **Hospital Escuela Eva Perón:** Miguel Angel Paciocco, Sandra Formula, Julia Pasquale, Schwank Sofia, Soso, German A.; **CEMIC:** Gustavo Leguizamón, Veronica Ramill, Denise Trigubo; **Maternidad Martín:** Daniel Natalio Crosta, Maria Fernanda Troiano, María Belen Bosch, Diana Sacarano, Anibal Hernan Pidone, Ricardo Spataro; **Hospital Provincial:** Ricardo Velasco, Celina Gialdini, Martina Salvai, Laura Truzzi, Hermán Garnica; **Sanatorio de la Mujer:** Haroldo Capurro, José Ignacio Emidi, Mauricio Fernando Belizán; **Hospital Roque Saenz Pena:** Gustavo Baccifava, Estefanía Solis, Marcelo Quacesi; **Hospital Iturraspe:** Guillermo Koch, Lucas Lavoy, M. Alida Tulián, Florencia Pieroni; **CREP:** Guillermo Carroli, Ranata Zanello, Berenise Carroli, Fernando Burgueño, Daniel Giodano, Hugo Gamero, Liana Campodónico, Ivana Lopez, Fernanda Candio.
